# Supplementary material for: Spectrum of Genetic Variants in a Cohort of 37 Laterality Defect Cases
Source: Front Genet. 2022 Apr 13;13:861236. doi: 10.3389/fgene.2022.861236 (PMC9083912; doi:10.3389/fgene.2022.861236)
Supplement: Supplementary file 1 [file Table1.xlsx]

## Sheet: Sheet1
Gene Name	Human Disease, inheritance pattern	Disease Model	Pubmed Id
ACVR2B	Heterotaxy, visceral, AD		9916847
AHI1		Zebrafish	27168933
AK7	Heterozygous changes in a cohort of PCD patients		22801010
ANKS3	Laterality defect and Cardiac defects, AR		27417436
ANKS6	Nephronophthisis, Laterality defect, Cardiac defetcs, AR		23793029
APC		Zebrafish	19103803, 24627794
ARL13B		Zebrafish	19906870
ARL2BP	Retinitis pigmentosa with or without situs inversus		23849777
ARMC4	PCD with Laterality defect, AR		23849778
BBS1	Bardet-Biedl syndrome, Laterality defect, Digenic Recessive, AR		30293640
BBS2	Bardet-Biedl syndrome, Laterality defect, AR		30293640
BBS4		Zebrafish	21266464
BBS5		Zebrafish	24559376
BBS6/MKKS		Zebrafish	16399798
BBS7		Zebrafish	16399798
BBS10	Bardet-Biedl syndrome, Laterality defect, AR		30293640
BBS12		Zebrafish	27168933
BMP4		Zebrafish	17395172, 24627794
BMPR2		Zebrafish	18222420, 24627794
BMS1	Novel candidate gene identified in laterality defect exome study,?		30622330
C11ORF70 (CFAP300)	PCD with laterality defect, AR		29727693
C21ORF59 (CFAP298)	PCD with laterality defect, AR		24094744
C9ORF116 (PIERCE1)		Mouse	27305836
CAMK2A		Zebrafish	20630945, 24627794
CAMK2B		Zebrafish	20630945, 24627794
CAMK2G		Zebrafish	20630945, 24627794
CCDC103	PCD with Laterality defect, AR		22581229
CCDC11	Heterotaxy, visceral, AR		22577226
CCDC114	PCD with Laterality defect, AR		23261303
CCDC151	PCD with Laterality defect, AR		25192045
CCDC39	PCD with Laterality defect, AR		21131972
CCDC40	PCD with Laterality defect, AR		21131974
CCDC65	PCD without situs inversus, AR		24094744
CEP131		Zebrafish	27168933
CEP290	Joubert Syndrome with Situs inversus, AR		17564967
CEP41		Zebrafish	27168933
CEP70		Zebrafish	27168933
CFAP45	Mild chronic upper respiratory symptoms and situs inversus totalis but did not fulﬁll criteria for a PCD diagnosis, AR		33139725
CFAP46	Laterality defect, CNV, Inheritance pattern NA		29843777
CFAP52	Laterality disorder, AR		25469542
CFC1	Heterotaxy, visceral, AD		11062482
CHD7		Zebrafish	21901784
CITED2		Mouse	15475956
COBL		Zebrafish	23203810, 24627794
CRELD1	Atrioventricular septal defect, partial, with heterotaxy syndrome, AD		12632326
DAND5		Mouse	15466485
DANH10	Copy number Variants in heterotaxy	Xenopus	29843777
DAW1		Planarian Schmidtea mediterranea	32359074
DNAAF1	PCD with Laterality defect, AR		19944400, 19944405
DNAAF2	PCD with Laterality defect, AR		19052621
DNAAF3	PCD with Laterality defect, AR		22387996
DNAAF4	PCD with Laterality defect, AR		23872636
DNAAF5	PCD with Laterality defect, AR		23040496
DNAAF10		planarianSchmidtea mediterranea (shRNA knockdown)	26912790
DNAH1	PCD with Laterality defect, AR		25927852
DNAH10		Chlamydomonas	15937072
DNAH11	PCD with Laterality defect, AR		12142464, 18022865
DNAH12		Chlamydomonas	15937072
DNAH14		Chlamydomonas	15937072
DNAH17		Chlamydomonas	15937072
DNAH2		Chlamydomonas	15937072
DNAH3		Chlamydomonas	15937072
DNAH5	PCD with Laterality defect, AR		11788826
DNAH6	heterotaxy and ciliary dysfunction similar to PCD, oligogeneic?	Chlamydomonas	26918822, 15937072
DNAH7		Chlamydomonas	15937072
DNAH8	Congenotal heart disease, asplenia, right-sided stomach, AR		32037394
DNAH9	PCD with Laterality defect, AR		30471717, 30471718 (Novel gene from this cohort)
DNAI1	PCD with Laterality defect, AR		11231901
DNAI2	PCD with Laterality defect, AR		18950741
DNAI3		Chlamydomonas	15469982
DNAI4		Zebrafish	30060180
DNAL1	PCD with Laterality defect, AR		21496787
DNAL4		Chlamydomonas	15937072
DRC3 (LRRC48)		Mouse	27261005
EPB41L5		Mouse	20678497
FGFR2C		Zebrafish	21747958, 24627794
FGFR4		Xenopus	3056413
FIPB1		Zebrafish	19164561
FOXC1		Zebrafish	33530637
FOXH1	Congenital heart disease and laterality, variant analysis in CHD and laterality cohort.		18538293
FOXJ1	Heterotaxy, AD		31630787
FZD2		Zebrafish	17013396, 24627794
GALNT11	Copy number Variants in heterotaxy	Xenopus	21282601
GDF1	Congenital heart defect and heterotaxy, AR, AD		28991257
GJA1	Congenital heart defect and laterality defect, AR?		7715640
GPR22		Zebrafish	25335082
GSK3B		Zebrafish	17683539, 24627794
HES7	spondylocostal dysostosis, dextrocardia with situs inversus, neural tube defects, AR		23897666
IER2		Zebrafish	19164561
IFT46		Mouse	25722189
IFT88		Zebrafish	16216239
INVS	Nephronophthisis (NPHP), Situs inversus, AR		12872123
ISL1	Novel candidate gene identified in laterality defect exome study, AD		30622330
IQCA1/ DRC11		Chlamydomonas	31659045
IQCD/DRC10		Chlamydomonas	31659045
KIF3A		Mouse	10220415
KIF3B		Mouse	9865700
KLF8		Zebrafish	28716076
LEFTY1		Mouse	9708731
LEFTY2	Two human laterality defect cases heterozygous change. Classified as variant of Unknown significance. Change found in one parent. Incomplete penetrance?	Mouse, embryonically lethal, did not characterize laterality defect	10053005, 10518210
LRRC56	PCD with Laterality defect, AR		30388400
LRRC6	PCD with Laterality defect, AR		23122589
LZTFL1	Bardet--Biedl syndrome, situs inversus, AR		22510444
MAN1A2		Zebrafish and mouse	33192543
MEGF8	Carpenter syndrome Laterality defect, AR		23063620
MMP21	Heterotaxy, AR		26437028
MNS1	Fertility and Laterality defect, AR		30148830 ((Novel gene from this cohort)
MYO1D		Zebrafish and xenopus	30139971, 29478852
NEK2	Copy number Variants in heterotaxy	Xenopus	21282601
NEK8	Heterotaxy, AR		23418306
NFATC1			30007050
NIPBL		Zebrafish	22039349, 24627794
NKD1		Zebrafish	20858476, 24627794
NKX2-5	Visceral inversus, polysplenia, symmetrical liver and atrial septal defect, AD		12414819
NME8	PCD with Laterality defect, AR		17360648
NODAL	Heterotaxy, AD		19064609
NOTCH1		Xenopus	24226769
NOTO		Mouse	17884984
NPHP3	Congenital anomalies of the kidney and urinary tract (CAKUT), Laterality defect, AR		18371931
NPHP4	Cardiac laterality defects and heterotaxy, AR		22550138
NUMB	Copy number Variants in heterotaxy	Xenopus	29843777
NUP188	Copy number Variants in heterotaxy	Xenopus	21282601
NUP205	Laterality defect, AR		31306055
NUP210	Laterality defect, AR		31306055
PACRG	Copy number Variants in heterotaxy	Xenopus	29843777 23351225
PCSK6		Mouse	10809672
PFKP	Copy number Variants in heterotaxy	Xenopus	27821535
PIFO	Laterality defect, Cystic kdney & liver disease, Double outflow right ventricle, AD		20643351
PIH1D1		Zebrafish	29741156
PIH1D2		Zebrafish	29741156
PIH1D3	PCD with Laterality defect, X-Linked		28041644
PITX2		Mouse	10499586
PKD1L1	Heterotaxy, visceral, AR		27616478
PKD2	Situs inversus and dextrocardia, AD		21719175
POC1B		Zebrafish	20008567
POLL		Mouse	11909969
PTPN11		Zebrafish	24718990
PXDNL	Novel candidate gene identified in laterality defect exome study,?		30622330
RAI2	Novel candidate gene identified in laterality defect exome study, Hemizygous		30622330
RCSD1		Zebrafish	17013396, 24627794
RFX2		Zebrafish and xenopus	22233545, 22227339
RFX3		Mouse	15121860
RIPPLY1	Novel candidate gene identified in laterality defect exome study, Hemizygous		30622330
RNF115	Copy number Variants in heterotaxy	Xenopus	29843777
ROCK2	Copy number Variants in heterotaxy	Xenopus	21282601
RPSA	Asplenia, isolated congenital, AD		23579497
SESN1		Zebrafish	17038485, 12607115
SHH		Mouse	10500184
SHROOM3	Heterotaxy, AR or AD		21936905
SMAD2	Laterality defect and congenital heart disease, AD		30622330
SNX10		Zebrafish	21844891
SPAG1	PCD with Laterality defect, AR		24055112
SUPT16H	Novel candidate gene identified in laterality defect exome study, AD		30622330
TBX6		Mouse	18575602
TCTN2	Copy number Variants in heterotaxy	Xenopus	29843777
TGFBR2	Copy number Variants in heterotaxy	Xenopus	21282601
TTC25	PCD with Laterality defect, AR		27486780
TTC26	Caroli Disease with Situs Inversus, AR		31595528
TTC8	Bardet-Biedl syndrome with Laterality defect, AR		14520415
TTC40	Copy number Variants in heterotaxy	Xenopus	29843777
UVRAG		Drosophila	21729695
WDR16	Laterality disorder, AR		25469542
WDR18		Zebrafish	21876750
WDR5	Heterotaxy,Missense Denovovariant		30377171
ZFYVE16	Novel candidate gene identified in laterality defect exome study, X-linked		30622330
ZIC3	Heterotaxy, visceral, X-linked		9354794
ZMYND10	PCD with Laterality defect, AR		23891469
ZNF423	Joubert Syndrome, Nephronophthisis, Situs inversus, AR, AD		22863007
CHD-Congenital heart disease
AD-Autosomal dominant
AR-Autosomal recessive
PCD-Primary ciliary dyskinesia
